# Supplementary material for: Genomic Characterization of XDR Mycobacterium tuberculosis Isolates in Argentina (2006-2015)
Source: Research Square preprint supplement (doi:10.21203/rs.3.rs-6456461/v1), 2025-05-13
Supplement: Supplementary file 1 [file c371b1af9dc9f0c510d373ca.docx]

# Supplementary material

Supplementary Table 1. Table detailing the mutations associated with resistance in Mycobacterium tuberculosis. It consists of four columns: Antibiotic (Isoniazid (I), Rifampicin (R), Ethambutol (E), Pyrazinamide (P), Streptomycin (S), Kanamycin (K), Amikacin (A), Capreomycin (C), and Fluoroquinolones (F)), Mutation (specific variant, genomic position, and affected gene), Resistant (number of resistant samples carrying the mutation), and Susceptible (number of susceptible samples carrying the mutation).

| **Antibiotic** | **Mutation** | **Resistant** | **Susceptible** |
| --- | --- | --- | --- |
| **I** | katG Ser315Thr | 26 | 0 |
| fabG1 C-15T | 8 | 0 |
| fabG1 C-8T | 1 | 0 |
| fabG1 Leu203Leu | 1 | 0 |
| No mutations | 0 | 0 |
| Total | 33 | 0 |
| R | rpoB Asp435Val | 7 | 0 |
| rpoB Ser450Leu | 24 | 0 |
| rpoA Val183Ala | 1 | 0 |
| rpoC Val483Gly | 1 | 0 |
| rpoB Gln432Leu | 1 | 0 |
| rpoB Asp435His | 1 | 0 |
| rpoC Phe452Ser | 1 | 0 |
| rpoB His445Asp | 1 | 0 |
| rpoC Trp484Gly | 1 | 0 |
| No mutations | 0 | 0 |
| Total | 33 | 0 |
| **E** | embB Gly406Ala | 4 | 5 |
| embB Gln497Arg | 1 | 1 |
| embB Met306Ile | 7 | 7 |
| embB Gly406Cys | 0 | 1 |
| embA -11C>A | 1 | 1 |
| embB Asp328Tyr | 1 | 0 |
| embB Met306Val | 1 | 0 |
| No mutations | 3 | 2 |
| Total | 18 | 16 |
| **P** | pncA Gln10Pro | 8 | 0 |
| pncA Asp86fs | 1 | 0 |
| pncA Ala134Val | 1 | 0 |
| pncA Val131fs | 1 | 0 |
| pncA Asp12Ala | 1 | 0 |
| pncA His51Arg | 1 | 0 |
| pncA Arg154Gly | 6 | 0 |
| pncA Trp68Ser | 1 | 0 |
| pncA Leu172Pro | 1 | 0 |
| pncA Val180Phe | 1 | 0 |
| pncA Ser104Arg | 1 | 0 |
| pncA Pro54Leu | 1 | 0 |
| pncA Glu127* | 1 | 0 |
| No mutations | 6 | 3 |
| Total | 30 | 3 |
| **S** | gid Leu16Arg | 10 | 3 |
| rrs 1401A>G | 19 | 5 |
| rrs 1484G>T | 0 | 1 |
| gid Val110fs | 7 | 1 |
| rpsL Lys88Arg | 2 | 0 |
| rpsL Lys43Arg | 3 | 0 |
| gid Arg39fs | 1 | 0 |
| No mutations | 2 | 2 |
| Total | 24 | 9 |
| **K** | eis -12C>T | 3 | 0 |
| rrs 1401A>G | 24 | 0 |
| rrs 1484G>T | 1 | 0 |
| eis -10G>A | 1 | 0 |
| No mutations | 4 | 0 |
| Total | 33 | 0 |
| **A** | rrs 1401A>G | 11 | 13 |
| eis -10G>A | 0 | 1 |
| rrs 1484G>T | 1 | 0 |
| No mutations | 1 | 6 |
| Total | 13 | 20 |
| **C** | rrs 1401A>G | 20 | 4 |
| rrs 1484G>T | 1 | 0 |
| No mutations | 3 | 5 |
| Total | 24 | 9 |
| **F** | gyrA Asp94Gly | 7 | 0 |
| gyrA Ala90Val | 5 | 0 |
| gyrA Ala90His | 4 | 0 |
| gyrA Asp94Ala | 4 | 0 |
| gyrB Arg446Cys | 3 | 0 |
| gyrA Asp94Tyr | 3 | 0 |
| gyrA Asp94Asn | 2 | 0 |
| gyrB Ala504Val | 1 | 0 |
| gyrA Gly88Cys | 1 | 0 |
| gyrA Ala74Ser | 1 | 0 |
| No mutations | 4 | 2 |
| Total | 31 | 2 |

# 
